# Supplementary material for: Phosphor-doped hexagonal boron nitride nanosheets as effective acid–base bifunctional catalysts for one-pot deacetalization–Knoevenagel cascade reactions
Source: Royal Society of Chemistry journal article supplement (doi:10.1039/c8cy01821a), 2018-01-01
Supplement: c8cy01821a1.pdf [file c8cy01821a1.pdf]

## Supporting Information

### Phosphor-doped hexagonal-boron nitride nanosheets as effective acid-base bifunctional catalyst for one-pot deacetalization-Knoevenagel cascade reaction

Jun Zhao<sup>a</sup>, Baining Lin<sup>a</sup>, Yifan Zhu<sup>a</sup>, Yonghua Zhou<sup>\* a</sup> and Hongyang Liu<sup>\* b</sup>

<sup>a</sup>College of Chemistry and Chemical Engineering, Central South University, 938 Lushannan Road, Changsha 410083, Hunan, China,

<sup>b</sup>Catalytic Materials Division, Institution Shenyang National Laboratory for Materials Science, Institute of Metal Research, Chinese Academy of Sciences, 72 Wenhua Road, Shenyang 110016, China

**Keywords:** *phosphor doping, boron nitride, acid-base catalysis, one-pot cascade reaction*

**Corresponding authors:** [zhouyonghua@csu.edu.cn](mailto:zhouyonghua@csu.edu.cn) (Y.H. Zhou), [liuhy@imr.ac.cn](mailto:liuhy@imr.ac.cn) (H.Y.Liu)

### Table of the contents

|                          |    |
|--------------------------|----|
| Supporting tables .....  | S2 |
| Supporting figures ..... | S6 |

## 1.Supporting tables

**Table S1** The inter-planer distance and thickness of single sheet of *h*-BN and BNP samples.

| sample       | inter-planer distance (nm) | Thickness of single sheet (nm) |
|--------------|----------------------------|--------------------------------|
| <i>h</i> -BN | 0.33                       | 2.26                           |
| BNP-E-2.1    | 0.37                       | 1.30                           |
| BNP-E-1.4    | 0.35                       | 1.50                           |
| BNP-E-2.8    | 0.35                       | 1.40                           |

Bragg equation and Scherrer equation were used to calculate the inter-planer distance and the thickness of single sheet, respectively. Bragg equation is described as Equation (1), and Scherrer equation is shown as equation (2).

$$2d_{hkl}\sin\theta_{hkl} = n\lambda \quad (1)$$

$$D_{hkl} = \frac{K\lambda}{\beta\cos\theta} \quad (2)$$

Where,  $\vartheta$  is the Bragg angle, with the unit of degree.  $d_{hkl}$  and  $D_{hkl}$  represents inter-planer distance and the thickness of single sheet with the unit of nm, respectively.  $K$  is the dimensionless shape factor, with a typical value of 1.  $\lambda$  is the X-ray wavelength of 0.154 nm, and  $\beta$  represents the full width at half maximum (FWHM).

**Table S2.** The atomic percentage of BNP-2.8 sample.

| Element            | B     | N     | P     | C     | O     |
|--------------------|-------|-------|-------|-------|-------|
| Atomic percentage% | 10.56 | 21.44 | 11.15 | 18.28 | 38.56 |

**Table S3.** The catalytic performances of BNP immobilized on cordierite in deacetalization-Knoevenagel cascade reaction.

| Reaction time, h | Conversion of 1, % | Yield of 2, % | Yield of 3, % | TON*, mol.h <sup>-1</sup> .g <sup>-1</sup> | TOF*, h <sup>-1</sup> |
|------------------|--------------------|---------------|---------------|--------------------------------------------|-----------------------|
| 0                | 0                  | 0             | 0             |                                            |                       |
| 2                | 60.21              | 35.61         | 24.60         | 153.76                                     | 26.52                 |
| 4                | 77.62              | 28.39         | 49.23         |                                            |                       |

Reaction conditions: Benzaldehyde dimethyl acetal (2.5mmol), Malononitrile (3mmol), toluene 20ml. BNP immobilized on cordierite catalyst 0.3 g, reaction temperature 80°C, in oil bath for 24 hours. \*TON and TOF were calculated according to the data at reaction time 2 hours. The amount of the dominant acid active site N<sub>3</sub>P-OH was estimated by the atom content and the ratio of N<sub>3</sub>P-OH and N<sub>2</sub>P=O revealed by XPS result.

**Table S4.** The specific surface area (BET) of the BNP catalysts.

| Sample                                             | BNP-1.4 | BNP-2.1 | BNP-2.8 |
|----------------------------------------------------|---------|---------|---------|
| Specific Surface area<br>(BET) , m <sup>2</sup> /g | 18.90   | 20.92   | 28.73   |

## 2.Supporting figures

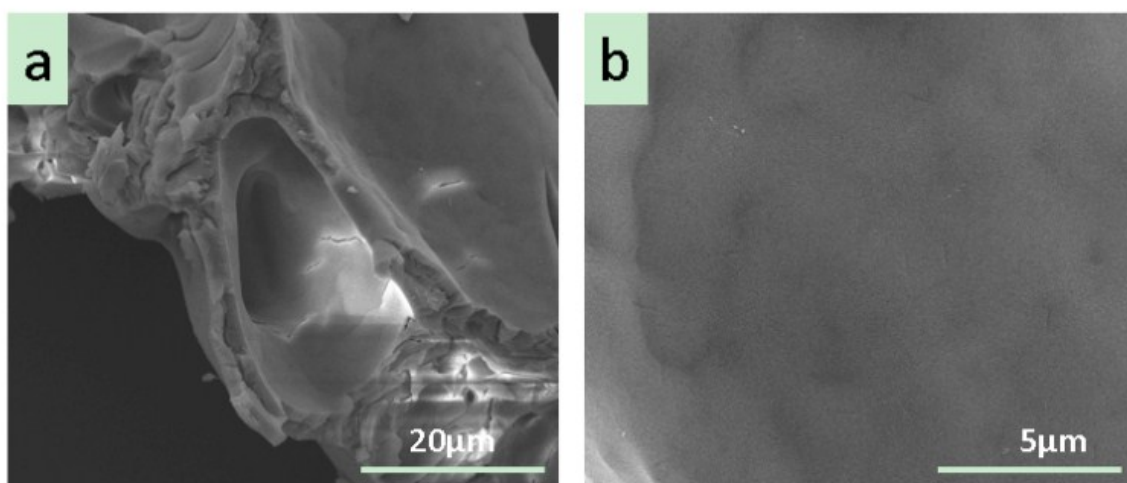

**Fig. S1.** SEM images of *h*-BN.

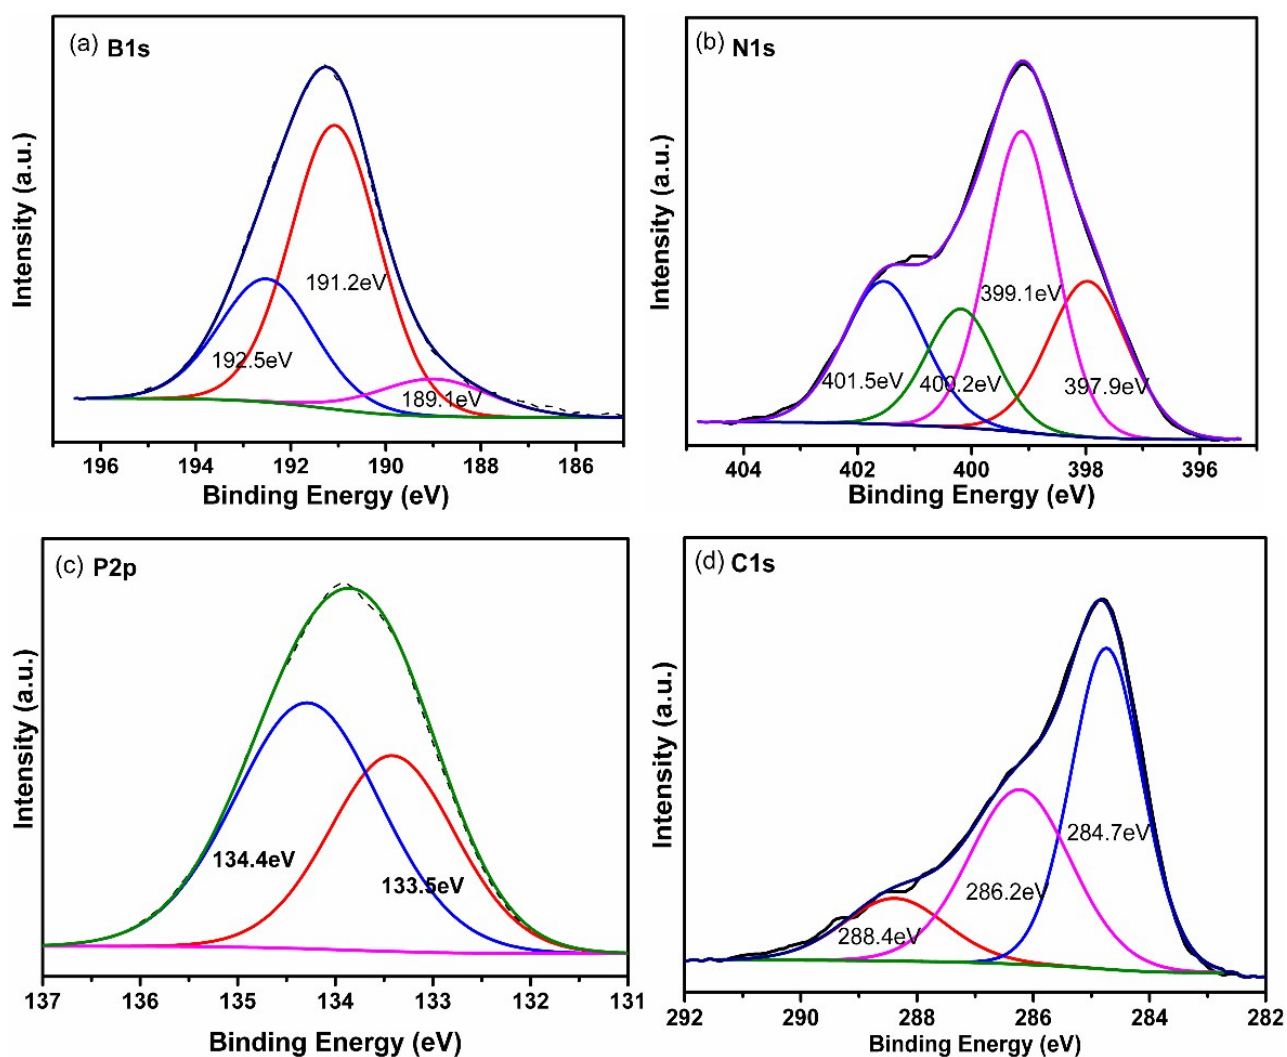

**Fig. S2.** The XPS spectra of BNP-2.8 sample B1s (a), N1s (b), P2p (c) and C1s(d).

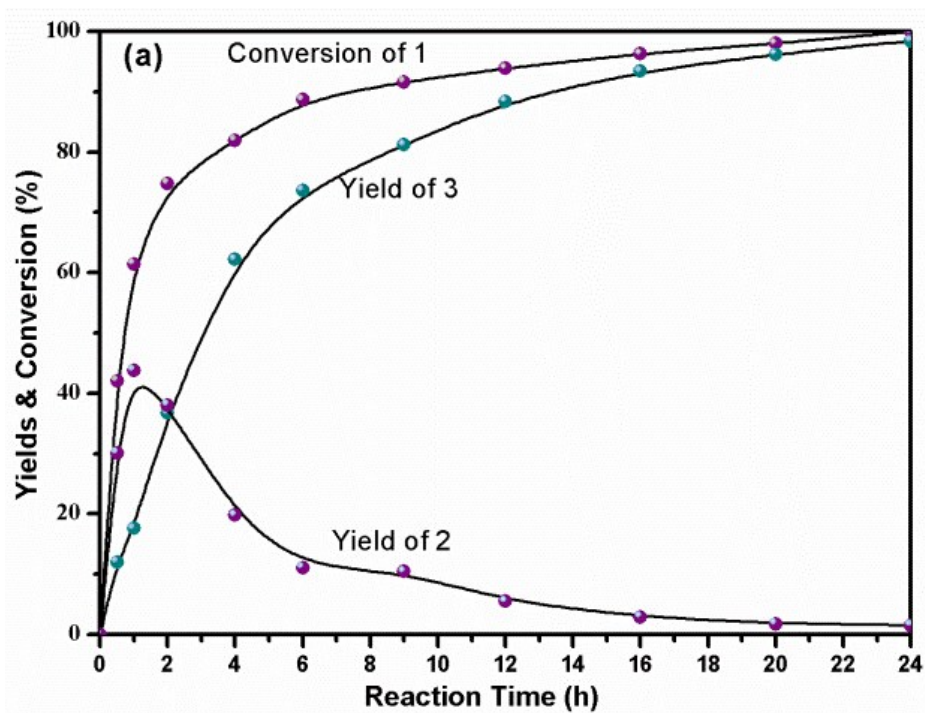

**Fig.S3.** The kinetics of one-pot deacetalization-Knoevenagel cascade reaction over BNP-2.1 sample



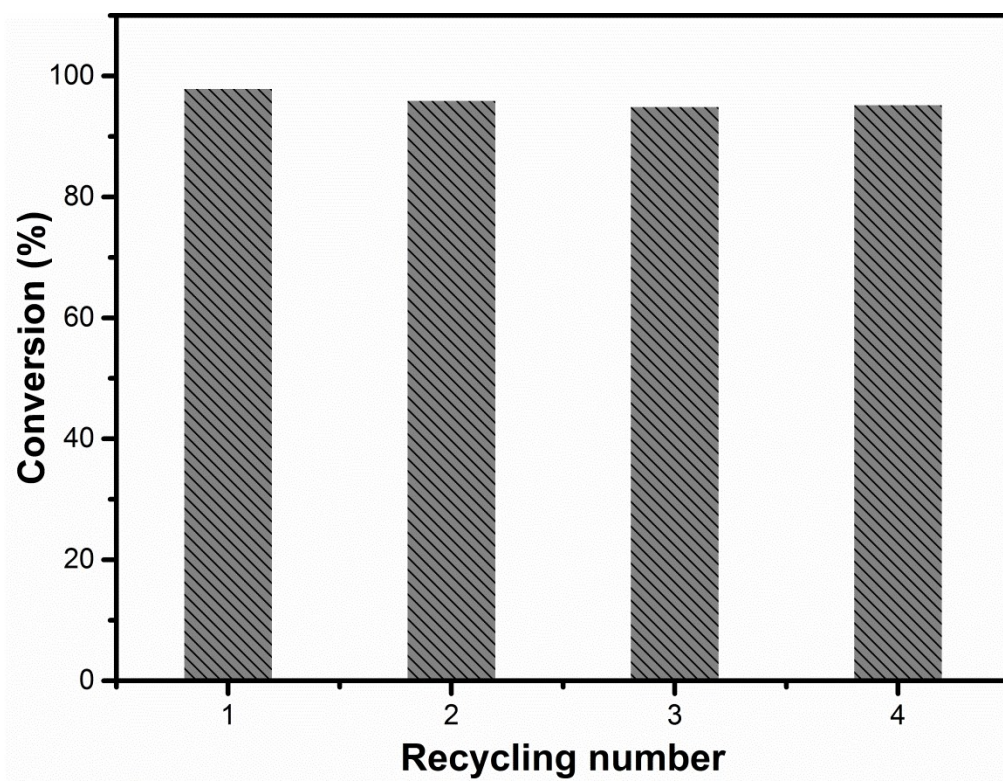

**Fig.S4.** The Reusability of BNP-2.1 sample with scaled-up reactant amount.

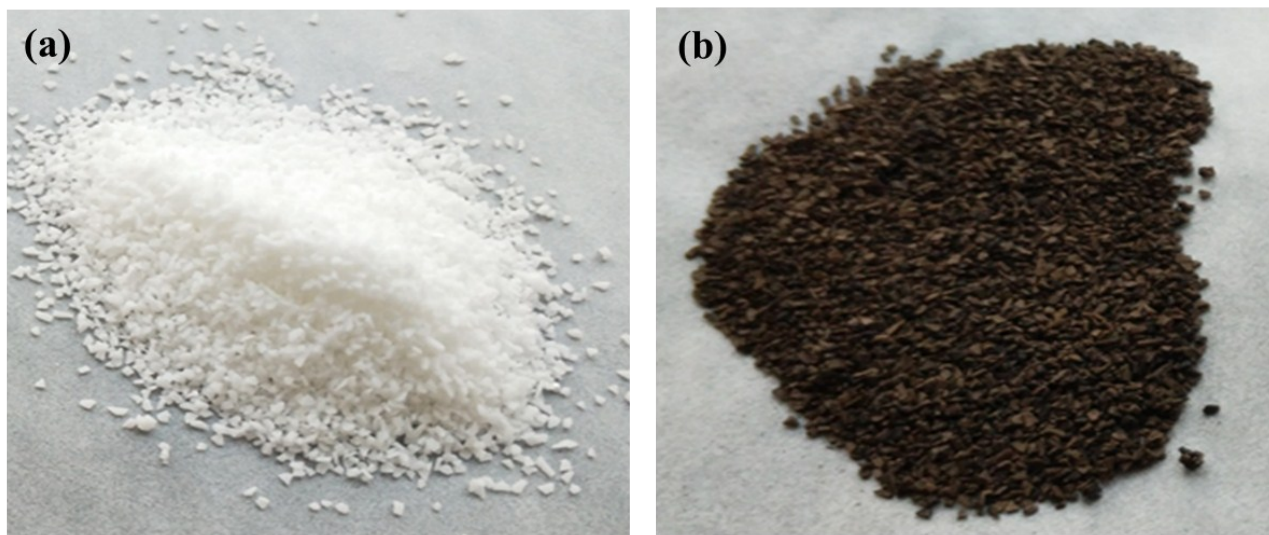

**Fig. S5.** Photo of (a) cordierite particles with 40-60 mesh and that (b) after BNP-2.1 immobilized thereon.
